# Supplementary material
Source: ML conference proceedings conference paper supplement (https://proceedings.mlr.press/v28/long13.html)

## ICML 2013 Permission to Publish Form

Title: Consistency versus realizable H-consistency for Multiclass Classification  
Authors: Philip M. Long and Rocco A. Servedio

The authors or owners of the above work grant IMLS (International Machine Learning Society) and ICML (International Conference on Machine Learning) the right to:

1. Publish the article/work in the proceedings of the 30th International Conference on Machine Learning (ICML-2013), as part of JMLR Workshop and Conference Proceedings series.
2. Print, sell, and distribute the proceedings.
3. Post the work on the ICML/IMLS web pages.

Also, the authors hereby grant to the Journal of Machine Learning Research the following rights with respect to the article described below:

- The right of publication in all media.
- The right to sublicense or transfer this license to any publisher of Journal of Machine Learning Research.

This license will be valid throughout the world throughout the entire term of copyright in the article, and is granted free of royalty. You will ensure that any dissemination of the article authorized by you gives appropriate first publication credit to Journal of Machine Learning Research. You explicitly reserve all other proprietary rights with respect to the article, including copyright and patent rights.

If there is more than one author of the article, the word *you* includes all authors jointly and severally. By signing this form, the signatory acknowledges that he or she is the corresponding author; that the signatory is signing on behalf of all authors of the article; and that the signatory has the authority to act as the agent for the other authors of the article.

You warrant that you are the sole author of the article, and generally that you have a complete and unencumbered right to make the grants you make to JMLR. You also warrant that the article does not libel anyone, invade anyone's copyright or otherwise violate any statutory or common law right of anyone, and that you have made all reasonable efforts to ensure the accuracy of any factual information contained in the article. You agree to indemnify JMLR, IMLS and any sublicensees against any claim or action alleging facts which, if true, constitute a breach of any of the foregoing warranties.

This is the entire agreement between JMLR and the authors, and it may be modified only in writing. It will be governed by the laws of the Commonwealth of Massachusetts. It will bind and benefit our respective assigns and successors in interest, including your heirs. It will terminate if JMLR does not publish, in any medium, your article within two years of the date of your signature(s).



Supplement: Supplementary file 1 [file long13-supp.pdf]
